# Supplementary material
Source: Springer Nature journal article supplement (https://www.springermedizin.de/resource/supplementary/12887_2011_619_MOESM1_ESM.pdf/9475368)

Pregnant women enrolled: 1137

\* 23 breastfeeding HIV negative women and 11 breastfeeding HIV positive women were missing at the 3 week interview when data on timing of breastfeeding initiation after birth was collected, hence the denominator increases between 3 and 6 weeks

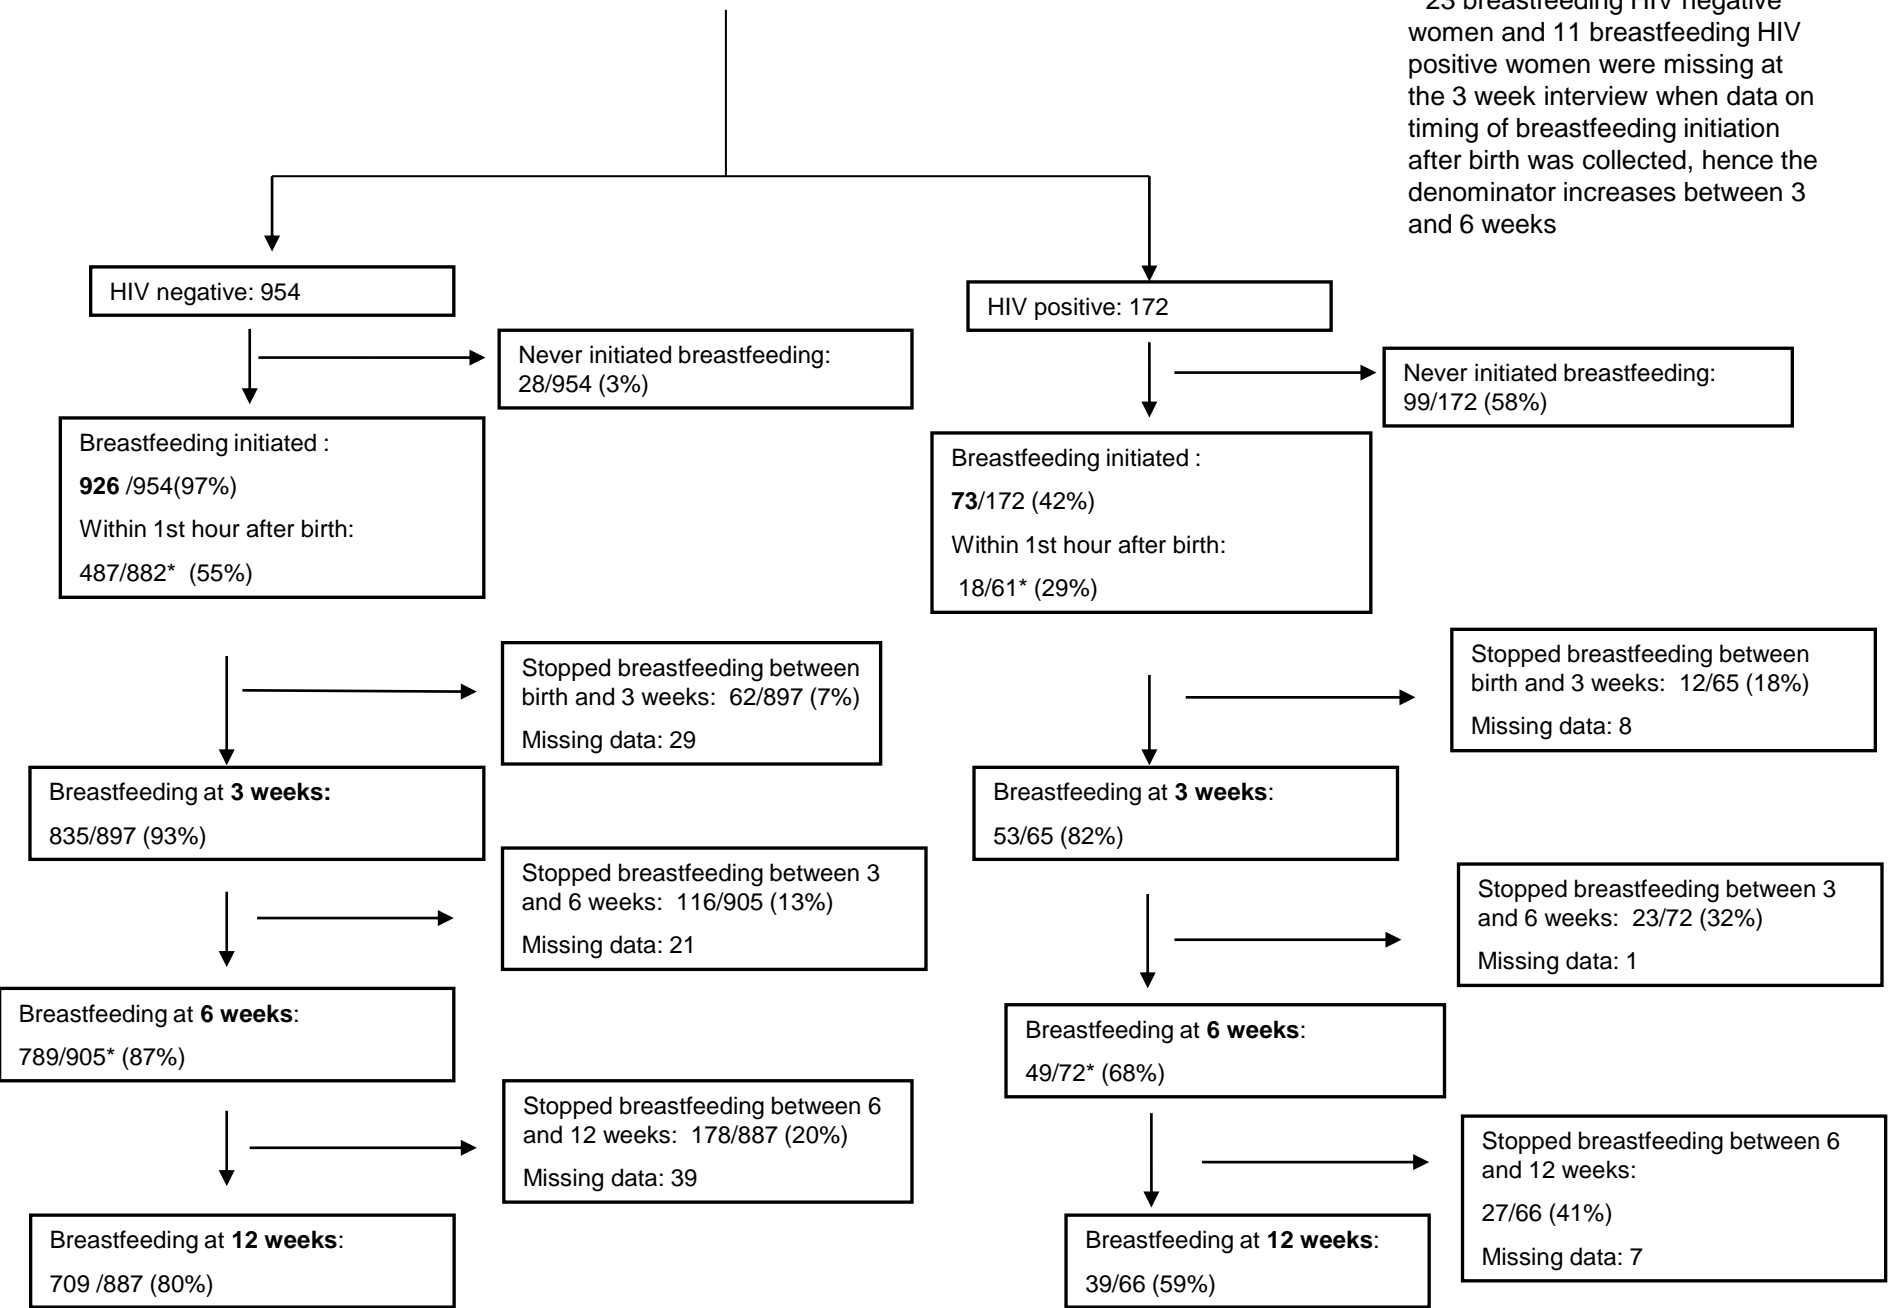

Supplement: MOESM1 [file 9475368]
